# Supplementary material for: Synthesis, crystal structure, and magnetic properties of oxynitride perovskites SrMn0.2M0.8O2.6N0.4 (M = Nb, Ta)
Source: Royal Society of Chemistry journal article supplement (doi:10.1039/d0dt00907e), 2020-01-01
Supplement: d0dt00907e1.pdf [file d0dt00907e1.pdf]

*Electronic Supplementary Information for*

**Synthesis, crystal structure, and magnetic property of oxynitride perovskites**

**SrMn<sub>0.2</sub>M<sub>0.8</sub>O<sub>2.6</sub>N<sub>0.4</sub> (M = Nb, Ta)**

Young-Il Kim<sup>a\*</sup> and Maxim Avdeev<sup>bc</sup>

<sup>a</sup> *Department of Chemistry, Yeungnam University, Gyeongsan 38541, Republic of Korea*

<sup>b</sup> *Bragg Institute, Australian Nuclear Science and Technology Organisation, Locked Bag 2001, Kirrawee DC, NSW 2232, Australia*

<sup>c</sup> *School of Chemistry, The University of Sydney, Sydney, NSW 2006, Australia*

\* Corresponding author. E-mail address: yikim@ynu.ac.kr (Y.-I. Kim).

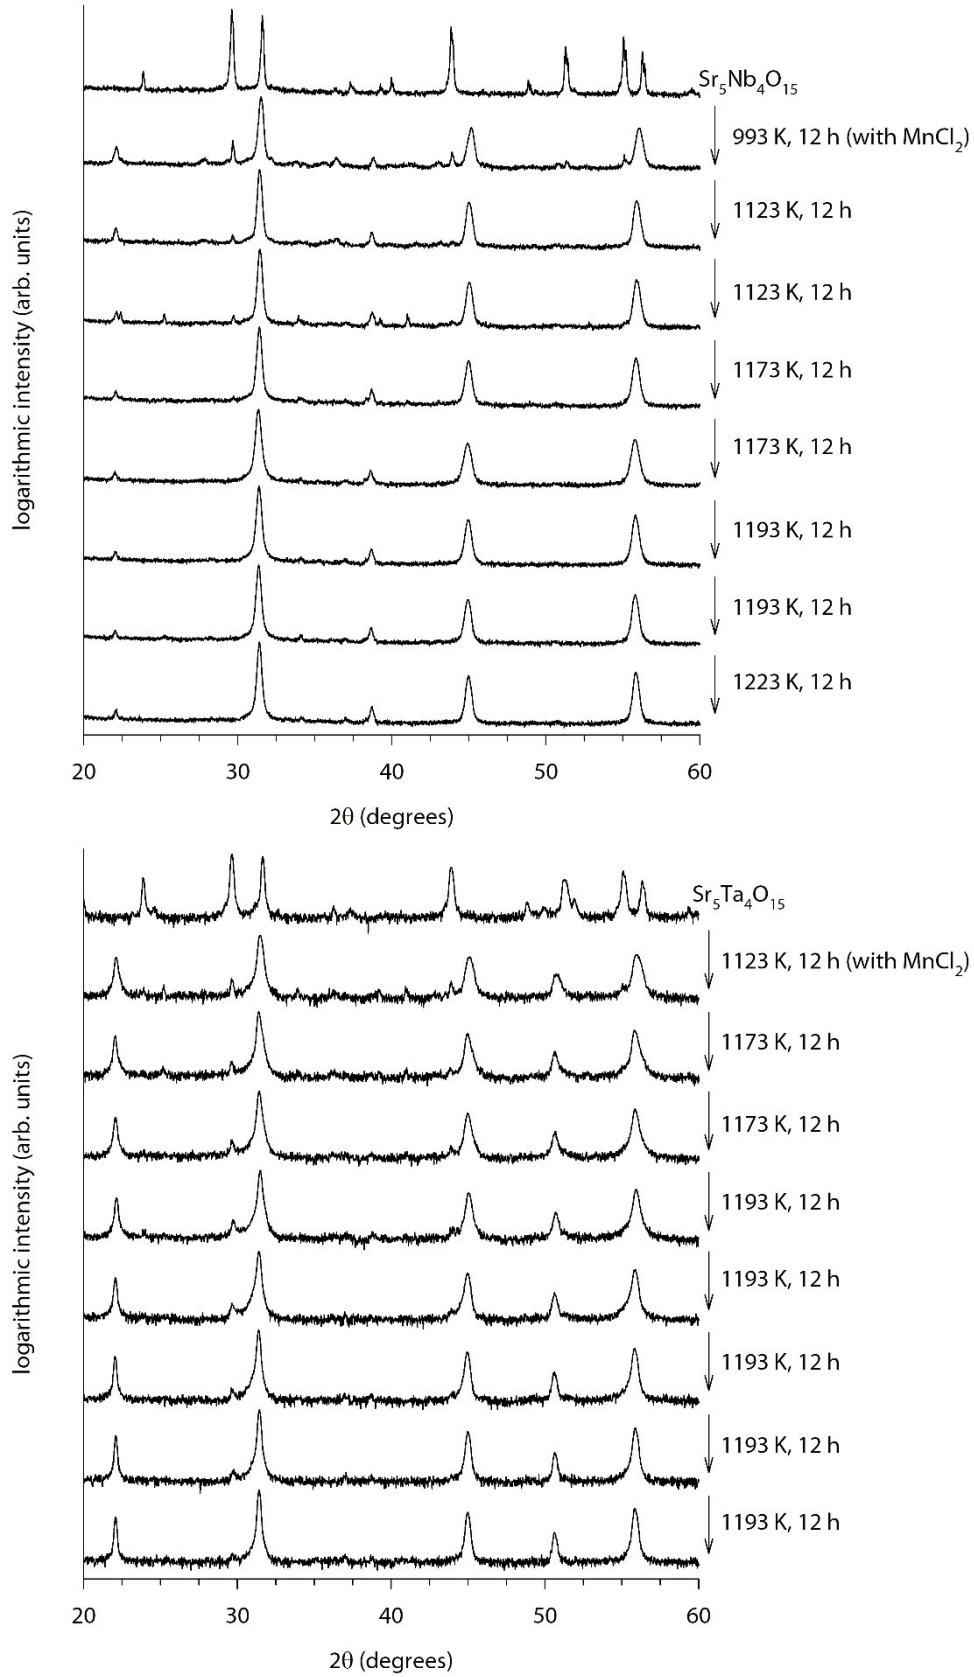

**Fig. S1.** Progressive evolutions of XRD patterns along the accumulated ammonolytic heating for preparing  $\text{SrMn}_{0.2}\text{Nb}_{0.8}\text{O}_{2.6}\text{N}_{0.4}$  (top) and  $\text{SrMn}_{0.2}\text{Ta}_{0.8}\text{O}_{2.6}\text{N}_{0.4}$  (bottom).

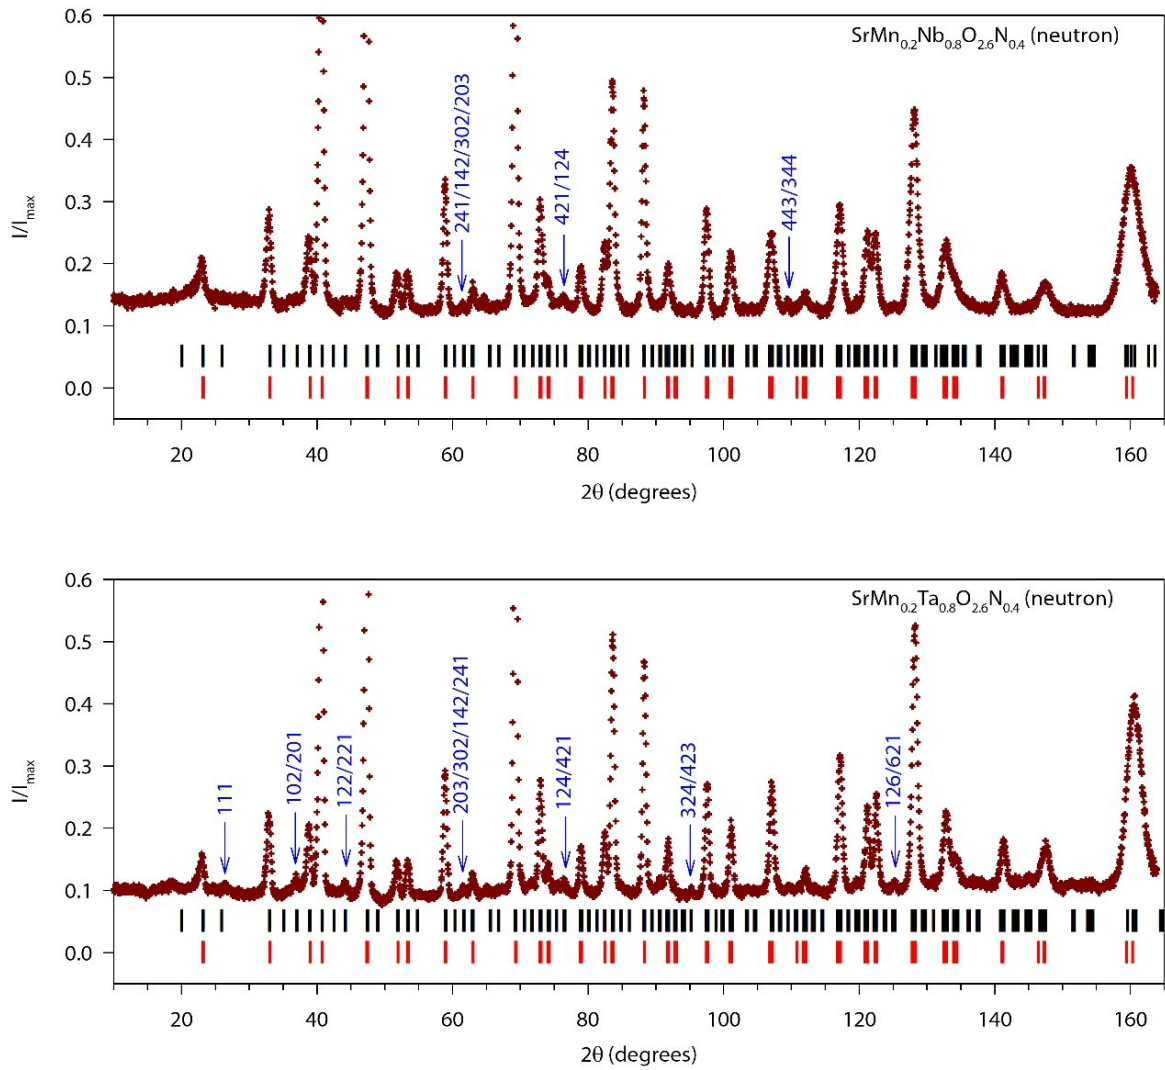

**Fig. S2.** Neutron diffraction patterns of  $\text{SrMn}_{0.2}\text{Nb}_{0.8}\text{O}_{2.6}\text{N}_{0.4}$  (top) and  $\text{SrMn}_{0.2}\text{Ta}_{0.8}\text{O}_{2.6}\text{N}_{0.4}$  (bottom), along with the Bragg positions of the  $Pnma$  (upper set) and  $I4/mcm$  (lower set) cells. Several peaks can be indexed based on the  $Pnma$  cell (Miller indices shown), but not on the  $I4/mcm$  cell.
